# Supplementary material for: Evolution of winter precipitation in the Nile river watershed since the last glacial
Source: Copernicus journal article supplement (doi:10.5194/cp-20-523-2024), 2024-03-14
Supplement: Supplementary file 1 [file cp-20-523-2024-supplement.pdf]

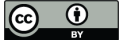

*Supplement of*

## **Evolution of winter precipitation in the Nile river watershed since the last glacial**

**Vera Dorothee Meyer et al.**

*Correspondence to:* Vera Dorothee Meyer (vmeyer@marum.de) and Enno Schefuß (eschefuss@marum.de)

The copyright of individual parts of the supplement might differ from the article licence.

## *S1. Analysis of stable carbon isotopes of HMW *n*-alkanoic acids*

The stable carbon isotopic composition ( $\delta^{13}\text{C}$ ) of high molecular weight (HMW) *n*-alkanoic acids was performed using gas chromatography coupled to isotope ratio mass spectrometry (GC-IRMS). The samples were measured on a Thermo Trace gas chromatograph coupled via a combustion reactor to a MAT252 mass spectrometer. Isotope values were measured against a calibrated reference gas ( $\text{CO}_2$ ) and are reported in per mil relative to the VPDB standards. To check the performance of the system, a standard mixture consisting of 16 *n*-alkanes was run every sixth sample. The accuracy and precision (mean deviation from offline values and the respective relative standard deviation, RSD) were 0.18 ‰ and 0.25 ‰, respectively. The machine was operated only when the average absolute deviation from offline values was <0.3 ‰. Replicate measurements of the samples yielded a standard deviation of 0.0-0.3 ‰. We report the  $\delta^{13}\text{C}$  of the *n*- $\text{C}_{26:0}$  and *n*- $\text{C}_{28:0}$  alkanolic acids as they turned out to be the most abundant homologues in our samples. Since the fatty acids were methylated to facilitate GC-IRMS analysis (see section 3 of the main manuscript), the  $\delta^{13}\text{C}$ -signature of the respective fatty acid methyl esters were corrected for the added methyl group using isotope mass balance ( $\delta^{13}\text{C}_{\text{wax } n\text{-alkanoic acid}}$ ).

## *S2. Calculating $\delta D$ of precipitation ( $\delta D_p$ )*

Correcting for isotopic fractionation that takes place during biosynthesis (apparent fractionation, referred to as  $\epsilon_{\text{app}}$ ) makes possible to reconstruct the  $\delta D_p$  from  $\delta D_{\text{wax}}$  (Sachse et al., 2012 and references within, Collins et al., 2013; Tierney et al., 2017). This, in turn depends on hydrological processes including rainfall amount, evapotranspiration or the moisture source. Moreover, thermodynamic fractionation associated with temperature changes can affect the isotopic composition of the source water (Sachse et al., 2012). Therefore, the  $\delta D_{\text{wax } n\text{-alkanoic acids}}$  (this study) and  $\delta D_{\text{wax } n\text{-alkanes}}$  (Castañeda et al., 2016a) from core GeoB7702-3 can be used to reconstruct  $\delta D_p$  once  $\epsilon_{\text{app}}$  is known.  $\epsilon_{\text{app}}$  varies across plant-species, particularly associated with different photosynthetic pathways.  $\text{C}_4$  grasses tend to have more negative  $\epsilon_{\text{app}}$  than  $\text{C}_3$  trees and shrubs (Sachse et al., 2012). In order to correct for past changes in  $\text{C}_4$  versus  $\text{C}_3$  plants ( $\delta D_{\text{p-vc}}$ , where “vc” refers to vegetation corrected) we inferred the relative abundance of  $\text{C}_4$  plants (% $\text{C}_4$ ) from the  $\delta^{13}\text{C}_{\text{wax } n\text{-alkanoic acids}}$  (this study) and  $\delta^{13}\text{C}_{\text{wax } n\text{-alkanes}}$  (Castañeda et al., 2016a) according to Collins et al. (2013). We used the endmember values for  $\text{C}_4$  and  $\text{C}_3$  plants given in the “all Africa” compilation by Garcin et al. (2014) ( $\text{C}_4$ : -19.8 ‰ and  $\text{C}_3$ : -33.4 ‰). Next,  $\epsilon_{\text{app}}$  was calculated using -113 ‰ and -126 ‰ as  $\epsilon_{\text{app}}$  endmembers for  $\text{C}_3$  and  $\text{C}_4$  plants, respectively (Sachse et al., 2012; Tierney et al., 2017). We note that these values correspond to the *n*- $\text{C}_{29}$  alkane homologue. As there are no comparable endmember data for the *n*- $\text{C}_{26:0}$  and *n*- $\text{C}_{28:0}$  alkanolic acids, we assume that alkanes and alkanolic acids have similar  $\epsilon_{\text{app}}$  values.

We forwent to correct for temperature changes because for the Nile region temperature corrections are problematic as temperature estimates provide an inconsistent picture regarding the amplitude of glacial-Holocene warming.  $\text{TEX}_{86}$ -based and alkenone-based sea surface temperature (SST) reconstructions from the Mediterranean Sea and the Red Sea are available but their amplitude of change varies between 6-10°C (Castañeda et al., 2010; Arz et al., 2003; Mathews et al., 2021) which is up to 2.5 times as much as climate models suggest for the change in mean annual surface temperature in the Nile delta region (5-6°C; Kageyama et al., 2021). Moreover, effects of seasonal or other biases leading to an overestimation of the true

amplitude of deglacial warming in the SST records cannot be ruled out (Castañeda et al., 2010). Therefore, we might overcorrect by using these SST reconstructions from the Mediterranean to correct the  $\delta D_{wax}$  for the temperature effect.

The influence of temperature on  $\delta D_p$  is generally considered negligible in low latitudes (Sachse et al., 2012) and for the arid Sahara, Tierney et al. (2017) find that the temperature effect has little influence on the  $\delta D_p$ . Accordingly, the error introduced to our  $\delta D_{p-vc}$  by avoiding a temperature correction should be small. Since colder conditions cause heavier precipitation, the inferred  $\delta D_{p-vc}$  estimates for the glacial should be regarded as minimum values, respectively maximal estimates of glacial rainfall amount.

$\delta D_{p-vc}$  were corrected for deglacial changes in global ice-volume ( $\delta D_{p-vc-ic}$ , where “ic” means ice volume corrected) applying stacked data of oxygen isotopic compositions ( $\delta^{18}O$ ) of benthic foraminifera (L04-stack; Lisiecki and Raymo, 2005) using the approach described in Ruan et al. (2019). The downcore results of  $\delta D_{p-vc-ic}$  are illustrated in Figure S1.

### S3. Supplementary Figures

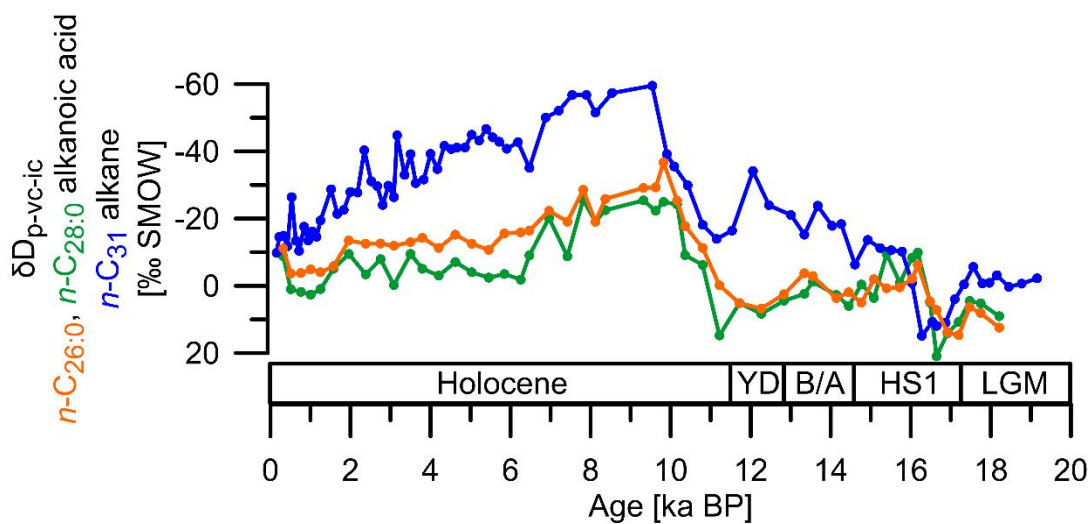

**Figure S1:**  $\delta D_{p-vc-ic}$  of HMW  $n$ -alkanoic acids and HMW  $n$ -alkanes calculated from  $\delta D_{wax n-alkanoic\ acids}$  (this study) and  $\delta D_{wax n-alkanes}$  (Castañeda et al., 2016a,b) in core GeoB7702-3.

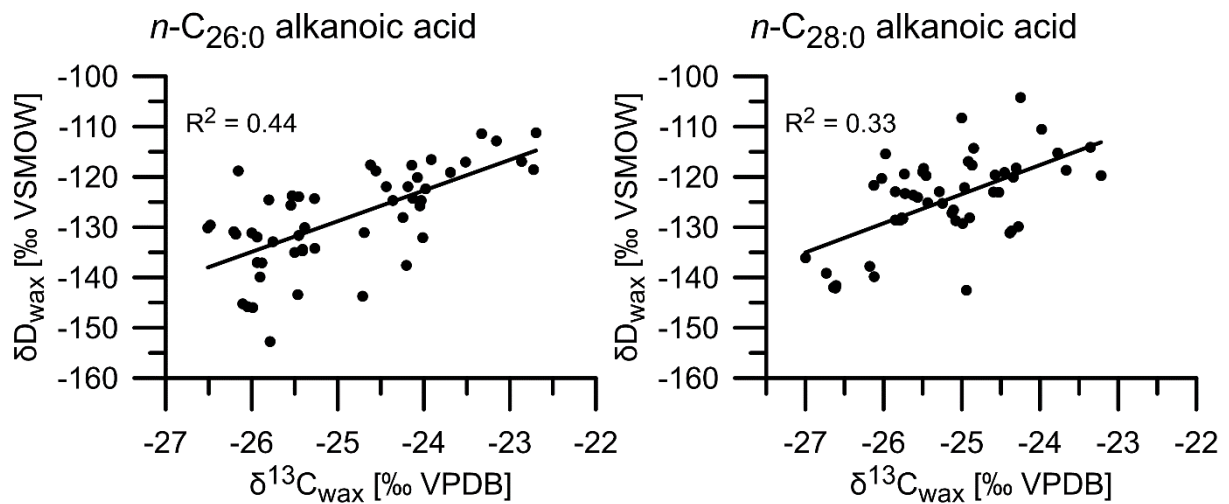

**Figure S2)** Correlation between  $\delta D_{wax}$  *n*-alkanoic acids and  $\delta^{13}C_{wax}$  *n*-alkanoic acids for the *n*-C<sub>26:0</sub> and *n*-C<sub>28:0</sub> homologues. The respective correlation coefficients ( $R^2$ ) are indicated and reveal poor linear correlations. Thus, a significant impact of changes in the abundance of C<sub>3</sub> versus C<sub>4</sub> plants on  $\delta D_{wax}$  *n*-alkanoic acids throughout the past 18 ka is unlikely.

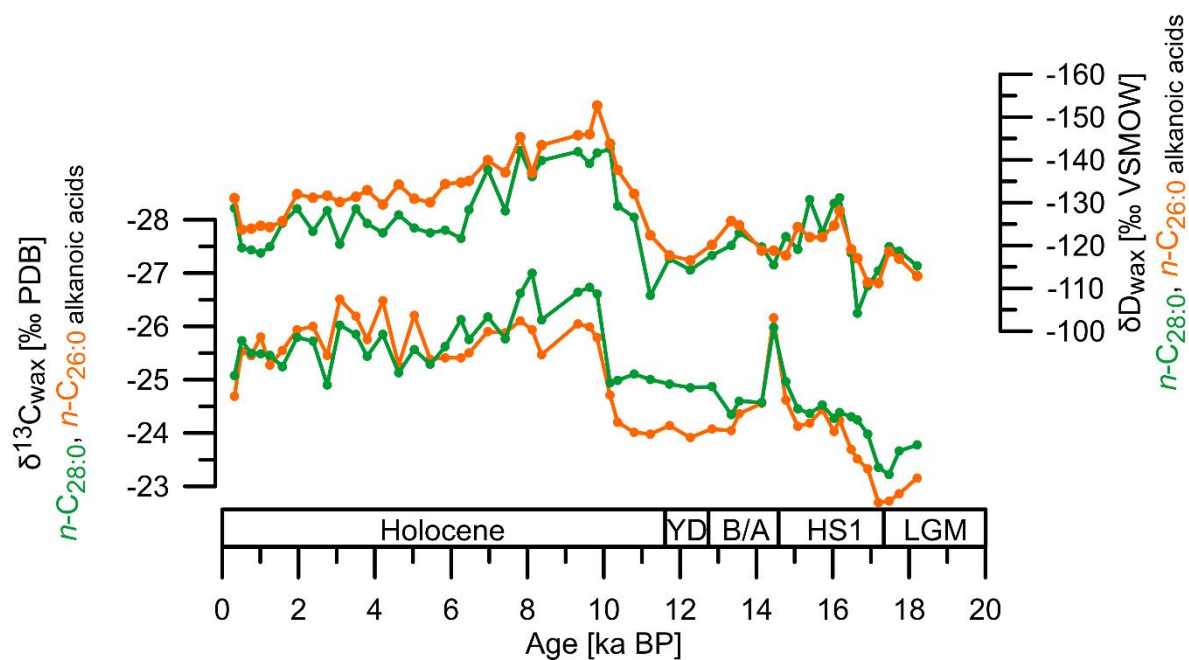

**Figure S3:**  $\delta^{13}C_{wax}$  *n*-alkanoic acids along with  $\delta D_{wax}$  *n*-alkanoic acids in core GeoB7702-3.

## References

Arz, H., Lamy, F., Pätzold, J., Müller, P. and Prins, M. A.: Mediterranean Moisture Source for an Early-Holocene Humid Period in the Northern Red Sea, *Science*, 300, 118–121, 2003.

Castañeda, I. S., Schefuß, E., Pätzold, J., Sinninghe Damsté, J. S., Weldeab, S. and Schouten, S.: Millennial-scale sea surface temperature changes in the eastern Mediterranean (Nile River Delta region) over the last 27,000 years, *Paleoceanography*, 25, 1–13, doi:10.1029/2009PA001740, 2010.

Castañeda, I. S., Schouten, S., Pätzold, J., Lucassen, F., Kasemann, S., Kuhlmann, H. and Schefuß, E.: Hydroclimate variability in the Nile River Basin during the past 28,000 years, *Earth Planet. Sci. Lett.*, 438, 47–56, doi:10.1016/j.epsl.2015.12.014, 2016a.

Castañeda, I. S., Schouten, S., Pätzold, J., Lucassen, F., Kasemann, S. A., Kuhlmann, H., and Schefuß, E.: Organic geochemical analyses of sediment core GeoB7702-3, PANGAEA [data set], doi.org:10.1594/PANGAEA.858559, 2016b.

Collins, J. A., Schefuß, E., Mulitza, S., Prange, M., Werner, M., Tharammal, T., Paul, A. and Wefer, G.: Estimating the hydrogen isotopic composition of past precipitation using leaf-waxes from western Africa, *Quat. Sci. Rev.*, 65, 88–101, doi:10.1016/j.quascirev.2013.01.007, 2013.

Garcin, Y., Schefuß, E., Schwab, V. F., Garreta, V., Gleixner, G., Vincens, A., Todou, G., Séné, O., Onana, J. M., Achoundong, G. and Sachse, D.: Reconstructing C<sub>3</sub> and C<sub>4</sub> vegetation cover using *n*-alkane carbon isotope ratios in recent lake sediments from Cameroon, Western Central Africa, *Geochim. Cosmochim. Acta*, 142, 482–500, doi:10.1016/j.gca.2014.07.004, 2014.

Lisiecki, L. E. and M. E. Raymo: A Pliocene-Pleistocene stack of 57 globally distributed benthic δ<sup>18</sup>O records, *Paleoceanography*, 20, PA1003, doi:10.1029/2004PA001071, 2005.

Kageyama, M., Harrison, S. P., Kapsch, M. L., Lofverstrom, M., Lora, J. M., Mikolajewicz, U., Sherriff-Tadano, S., Vadsaria, T., Abe-Ouchi, A., Bouttes, N., Chandan, D., Gregoire, L. J., Ivanovic, R. F., Izumi, K., Legrande, A. N., Lhardy, F., Lohmann, G., Morozova, P. A., Ohgaito, R., Paul, A., Richard Peltier, W., Poulsen, C. J., Quiquet, A., Roche, D. M., Shi, X., Tierney, J. E., Valdes, P. J., Volodin, E. and Zhu, J.: The PMIP4 Last Glacial Maximum experiments: Preliminary results and comparison with the PMIP3 simulations, *Clim. Past*, 17(3), 1065–1089, doi:10.5194/cp-17-1065-2021, 2021.

Matthews, A., Affek, H., Ayalon, A., Vohnhof, H. and Bar-Matthews, M.: Eastern Mediterranean climate change deduced from the Soreq Cave fluid inclusion stable isotopes and carbonate clumped isotopes record of the last 160 ka, *Quat. Sci. Rev.*, 272, 107223, <https://doi.org/10.1016/j.quascirev.2021.107223>, 2021.

Ruan, Y., Mohtadi, M., van der Kaas, S., Dupont, L. M., Hebbeln, D. and Schefuß, E.: Differential hydro-climatic evolution of East Javanese ecosystems over the past 22,000 years, *Quat. Sci. Rev.*, 218, 49-60, doi:10.1016/j.quascirev.2019.06.015, 2019.

Sachse, D., Billault, I., Bowen, G. J., Chikaraishi, Y., Dawson, T. E., Feakins, S. J., Freeman, K. H., Magill, C. R., McInerney, F. A., van der Meer, M. T. J., Polissar, P., Robins, R. J., Sachs, J. P., Schmidt, H.-L., Sessions, A. L., White, J. W. C., West, J. B. and Kahmen, A.: Molecular Paleohydrology: Interpreting the Hydrogen-Isotopic Composition of Lipid Biomarkers from Photosynthesizing Organisms, *Annu. Rev. Earth Planet. Sci.*, 40, 221–249, doi:10.1146/annurev-earth-042711-105535, 2012.

Tierney, J. E., Pausata, F. S. R. and deMenocal, P. B.: Rainfall regimes of the Green Sahara, *Sci. Adv.*, 3, 1–10, doi:10.1126/sciadv.1601503, 2017.
